# Supplementary material
Source: bioRxiv or medRxiv preprint supplement (https://www.biorxiv.org/highwire/filestream/42891/field_highwire_adjunct_files/6/145060-7.pdf)
Supplement: Supplementary file [file 145060-7.pdf]

Table 2. Plasmids used in this study

| Plasmid name              | Lab number   | Markers                   | Reference                        |
|---------------------------|--------------|---------------------------|----------------------------------|
| <i>pCUP-SUP35PrD-GFP</i>  | <i>p3032</i> | <i>LEU2, CEN</i>          | (Zhou et al., 2001)              |
| <i>pCUP-SUP35PrD-GFP</i>  | <i>p3031</i> | <i>HIS3, CEN</i>          | (Zhou et al., 2001)              |
| <i>pCUP-SUP35PrD-CFP</i>  | <i>p3053</i> | <i>HIS, CEN</i>           | (Du et al., 2014)                |
| <i>pCOF1-COF1-RFP</i>     | <i>p3069</i> | <i>URA3, CEN</i>          | (Lin et al., 2010)               |
| <i>pABP140-ABP140-YFP</i> | <i>p3089</i> | <i>URA3, Integrating</i>  | (Buttery et al., 2007)           |
| <i>pLEU2-ura3-14</i>      | <i>p3107</i> | <i>LEU2, ura3-14, CEN</i> | (Manogaran et al., 2006)         |
| <i>pCUP-RNQ1-GFP</i>      | <i>p3036</i> | <i>LEU2, CEN</i>          | (Sondheimer and Lindquist, 2000) |
